# Supplementary material
Source: PubMed Central journal article supplement (PMC4968532)
Supplement: AEM.01018-16_zam999117346so1.pdf [file AEM.01018-16_zam999117346so1.pdf]

# Supplemental Material

## Metabolism of *myo*-inositol by *Legionella pneumophila* promotes infection of amoeba and macrophages

Christian Manske<sup>1</sup>, Ursula Schell<sup>1</sup> and Hubert Hilbi<sup>1,2\*</sup>

<sup>1</sup> Max von Pettenkofer Institute, Ludwig-Maximilians University, Munich, Germany

<sup>2</sup> Institute of Medical Microbiology, University of Zürich, Switzerland

Running title: Inositol metabolism by *L. pneumophila*

**Key words:** amoeba, bipartite metabolism, Legionnaires' disease, macrophage, nutrition, pathogen vacuole, phytate, transport, type IV secretion

\*Address correspondence to Hubert Hilbi, Gloriastrasse 30, 8006 Zürich, Switzerland,

Tel +41-44-634-2650, Fax +41-44-634-4906, e-mail hilbi@imm.uzh.ch

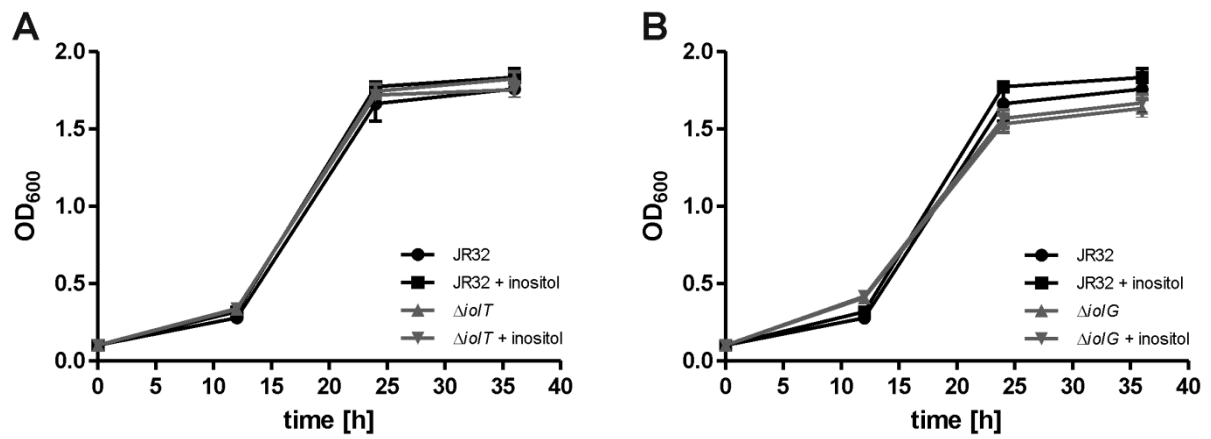

**FIG S1** Growth of the *L. pneumophila* mutant strains  $\Delta iolT$  and  $\Delta iolG$  in CDM. Extracellular growth of *L. pneumophila* JR32,  $\Delta iolT$  or  $\Delta iolG$  in CDM with and without 10 mM inositol was assessed. Optical density at 600 nm was determined at the time points indicated.

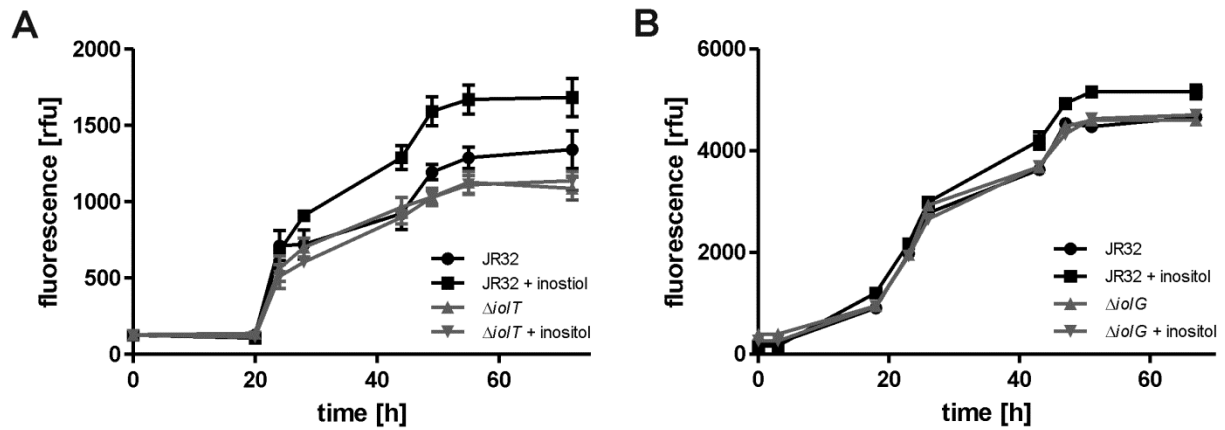

**FIG S2** Inositol promotes intracellular growth of *L. pneumophila* at 4 h post infection. *A. castellanii* was infected (MOI 20) with *L. pneumophila* JR32, (A)  $\Delta iolT$  or (B)  $\Delta iolG$  harboring plasmid pNT28 (constitutive GFP production). 20 mM inositol was added 4 h post infection, and replication was determined by fluorescence. Mean and SD of triplicates are shown (Student's *t*-test; A, > 44 h:  $p < 0.01$ ; B, > 26 h:  $p < 0.05$ ). Data are representative of three independent experiments.

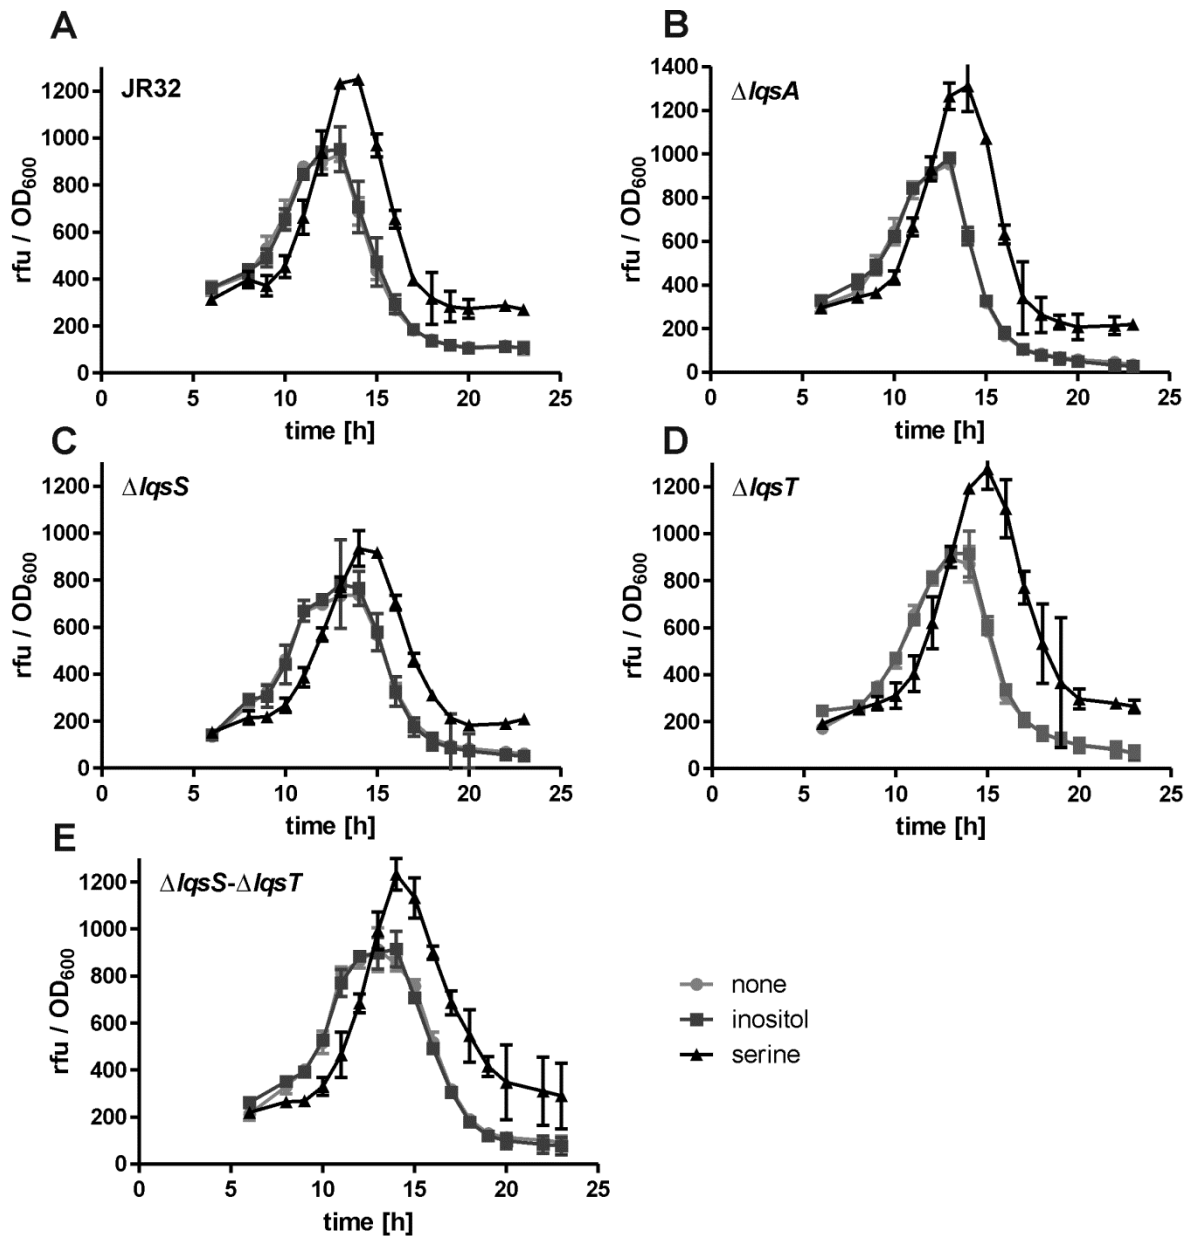

**FIG S3** Expression of  $P_{iol}$  is not regulated by *lqs* genes. Exponentially growing cultures of (A) *L. pneumophila* JR32, (B)  $\Delta lqsA$ , (C)  $\Delta lqsS$ , (D)  $\Delta lqsT$  or (E)  $\Delta lqsS-\Delta lqsT$  harboring plasmid pCM007 (unstable GFP (ASV) under control of  $P_{iol}$ ) were diluted to a starting OD<sub>600</sub> of 0.1 in AYE broth. The bacteria were grown at 37°C with 10 mM inositol, 6 mM serine or without additional nutrients (none). Optical density at 600 nm and GFP fluorescence was measured every hour for 24 h, and results were plotted with RFU as function of OD<sub>600</sub> over time. Mean and SD of triplicates are shown (Student's *t*-test; A-E [serine *versus* none], > 14 h:  $p < 0.05$ ). Data are representative of three independent experiments.

**TABLE S1** Oligonucleotides used in this study.

| Oligonucleotide            | Sequence (5' – 3'), restriction sites underlined | Description                                |
|----------------------------|--------------------------------------------------|--------------------------------------------|
| <i>iol</i> -660-fo-Seq     | TACTGGGGAGTAGTTTGTGTGC                           | seq. primer of <i>iolT</i>                 |
| <i>iol</i> -1347-fo-Seq    | TCAGTGGTACTTTGATCGCA                             | seq. primer of <i>iolT</i>                 |
| <i>iol</i> -2051-fo-Seq    | CATCTCGAACAAATTATTACAGCG                         | seq. primer of <i>iolT</i>                 |
| <i>iol</i> -2744-fo-Seq    | GATGGACTACAAGCCTTGCG                             | seq. primer of <i>iolT</i>                 |
| <i>iol</i> -3459-fo-Seq    | TATGCGATTTGATTGTTGGG                             | seq. primer of <i>iolT</i>                 |
| <i>iol</i> -7042-re-Seq    | GAAGTCGTAAGCAATTCGGC                             | seq. primer of <i>iolT</i>                 |
| <i>iol</i> -6351-re-Seq    | CCCAATCCCTCTGCGTACT                              | seq. primer of <i>iolT</i>                 |
| <i>iol</i> -5655-re-Seq    | AAAGCCCATTTGGAAGCTGT                             | seq. primer of <i>iolT</i>                 |
| <i>iol</i> -4942-re-Seq    | TTTTTGTTTGGCATAGGCG                              | seq. primer of <i>iolT</i>                 |
| <i>iol</i> -4241-re-Seq    | AAAATAAATTTTCGTTTCCGTTTC                         | seq. primer of <i>iolT</i>                 |
| <i>iolG</i> -1400up-fo     | ATGAACAAGGGAATGAAC                               | seq. primer of <i>iolG</i>                 |
| <i>iolG</i> -511-fo        | ATATTTATGGACATGTCT                               | seq. primer of <i>iolG</i>                 |
| <i>iolG</i> -451-fo        | CGAATTACTTCTCGTGAT                               | seq. primer of <i>iolG</i>                 |
| <i>iolG</i> -301-re        | TATCTCTTCTTCATTCAA                               | seq. primer of <i>iolG</i>                 |
| <i>iolG</i> -1400down-re   | GTCTAACTCAAGCATATTAGA                            | seq. primer of <i>iolG</i>                 |
| <i>iolG</i> -850bp-fo      | CCGCTGGATAATGATTAA                               | seq. primer of <i>iolG</i>                 |
| <i>iolG</i> -850bp-re      | GATTTTGCCTGTAATAGA                               | seq. primer of <i>iolG</i>                 |
| <i>iolG</i> -LB-XbaI-fo    | GGCCAGTCTAGAAATAATATTCAGCAGGAATTG                | 800 bp 5'-flanking region of <i>iolG</i>   |
| <i>iolG</i> -LB-SalI-re    | TTTCATGTCGACTCCATAATTAAATTAATTTTGC               | 800 bp 5'-flanking region of <i>iolG</i>   |
| <i>iolG</i> -RB-SalI-fo    | AGTTGAGTCGACTATGAAACAGTTTCCCGG                   | 800 bp 3'-flanking region of <i>iolG</i>   |
| <i>iolG</i> -RB-XbaI-re    | CGAGCATCTAGATCTCCTAATTTAACAAC                    | 800 bp 5'-flanking region of <i>iolG</i>   |
| <i>iolT</i> -400bp-SacI-fo | GACGATGAGCTCTTTTGTGTTCAAACGGCAGA                 | P <sub><i>iolT</i></sub> 400 bp for pCM007 |
| <i>iolT</i> -400bp-XbaI-re | TCCCTTTCTAGAGTAACTATCTGTCCCTAATG                 | P <sub><i>iolT</i></sub> 400 bp for pCM007 |

|                            |                                                |                                          |
|----------------------------|------------------------------------------------|------------------------------------------|
| <i>iolT</i> -BamHI-fo-comp | ACAGAT <u>GGATCC</u> ATGAACAAGGGAATGAAC        | <i>iolT</i> for complementation          |
| <i>iolT</i> -SalI-re-comp  | TCTTTT <u>GTCGAC</u> TTAATCCATAATTAATTAATTTTGC | <i>iolT</i> for complementation          |
| <i>iolG</i> -BamHI-fo-comp | TATGGAGGATCCATGAAAAAGAAAATATGTCGAATTGGG        | <i>iolG</i> for complementation          |
| <i>iolG</i> -SalI-re-comp  | TTCATAG <u>TTCGAC</u> TCAACTCAATACTACTGGCAG    | <i>iolG</i> for complementation          |
| <i>iolT</i> -LB-XbaI-fo    | AATATG <u>TCTAGACA</u> ATTGTCTTTGGCAGCAGA      | 500 bp 5'-flanking region of <i>iolT</i> |
| <i>iolT</i> -LB-SalI-re    | CTGTT <u>CGTCGAC</u> GATGTTATCACGGCCAGGTT      | 500 bp 5'-flanking region of <i>iolT</i> |
| <i>iolT</i> -RB-SalI-fo    | TCGAAT <u>GTCGAC</u> AGTAGGTGCGGGAAGAATTG      | 500 bp 3'-flanking region of <i>iolT</i> |
| <i>iolT</i> -RB-XbaI-re    | TCAAGG <u>TCTAGAT</u> ATTGAGGTTTTGCGCCATC      | 500 bp 3'-flanking region of <i>iolT</i> |

---
